# Supplementary material for: Effect of mulberry leaf or mulberry leaf extract on glycemic traits: a systematic review and meta-analysis
Source: Royal Society of Chemistry journal article supplement (doi:10.1039/d2fo02645g), 2022-12-26
Supplement: d2fo02645g2.pdf [file d2fo02645g2.pdf]

Supplemental 2

Methods

Search strategy

Pubmed

(' mulberry leaf ' OR ' mulberry leave ' OR ' Morus indica L. ' OR ' 1-deoxynojirimycin  
' OR ' 1-DNJ ') AND (' glycemic control ' OR ' glycaemic control ' OR ' glucose control  
' OR ' diabetes diabetic ' OR ' type 2 diabetes mellitus ' OR ' T2DM ' OR ' glucose ' OR  
' blood sugar ' OR ' fasting blood glucose ' OR ' glycated hemoglobin ' OR ' glycosylated  
hemoglobin ' OR ' HbA1c ' OR ' GHB ' OR ' insulin ' OR ' insulin sensitivity ' OR ' iletin  
' OR ' Ins ' )

(Humans [ptyp] AND Clinical Trial [ptyp]) in All Text

Table S1 The changes of mean and standard deviation at the baseline and endpoint.

Table S2 Sensitivity analysis for FBG, HbA1c and FPI by a fixed-effect model.

Table S3 GRADE evidence profile for effect of ML/MLE supplementation on glycemic trail.

Table S1 The changes of mean and standard deviation at the baseline and endpoint.

| Study ID                                | FPG              |             |                  |             | HbA1c            |             |                  |             | FPI              |             |                  |             |
|-----------------------------------------|------------------|-------------|------------------|-------------|------------------|-------------|------------------|-------------|------------------|-------------|------------------|-------------|
|                                         | IG               |             | CG               |             | IG               |             | CG               |             | IG               |             | CG               |             |
|                                         | $\Delta \bar{x}$ | $\Delta SD$ |
| Andallu et al., 2001 <sup>1</sup>       | -2.34            | 0.30        | -0.70            | 0.24        | -14.21           | 4.14        | -1.09            | 4.14        |                  |             |                  |             |
| Aramwit et al., 2011 <sup>2</sup>       | -0.16            | 0.09        | -0.14            | 0.08        | 0                | 5.13        | -1.09            | 3.19        |                  |             |                  |             |
| Kim et al., 2015 <sup>3</sup>           | 0.26             | 0.62        | 0.21             | 0.60        | -0.77            | 9.20        | -0.22            | 10.47       | 1.99             | 1.04        | 0.23             | 2.50        |
| Kimura et al., 2007 <sup>4</sup>        | -0.03            | 0.18        | -0.02            | 0.11        |                  |             |                  |             |                  |             |                  |             |
| Kojima et al., 2010 <sup>5</sup>        | -0.17            | 0.34        | -0.17            | 0.28        | -1.09            | 1.95        | -2.19            | 3.75        | -2.76            | 6.08        | -0.56            | 4.17        |
| Qi et al., 2018 <sup>6</sup>            | -4.45            | 1.60        | -2.31            | 1.81        | -30.49           | 9.81        | -16.72           | 11.24       |                  |             |                  |             |
| Riche et al., 2017 <sup>7</sup>         | -1.33            | 1.82        | -1.08            | 1.25        | -3.93            | 3.27        | -3.17            | 3.87        |                  |             |                  |             |
| Taghizadeh et al., 2022 <sup>8</sup>    | -0.41            | 2.76        | -0.15            | 2.42        | -3.28            | 10.94       | -1.42            | 8.30        | -1.00            | 5.60        | 1.60             | 9.49        |
| Thaipitakwong et al., 2020 <sup>9</sup> | -0.21            | 0.60        | -0.04            | 0.58        | -1.31            | 2.47        | 0.66             | 2.53        | -1.13            | 8.01        | -0.34            | 6.59        |
| Trimarco et al., 2015 <sup>10</sup>     | -0.43            | 0.46        | -0.15            | 0.71        | -0.78            | 4.55        | -1.01            | 4.24        | -2.20            | 6.82        | -0.40            | 6.61        |
| Yang et al, 2019 <sup>11</sup>          | -1.79            | 1.55        | -0.97            | 1.61        | -12.46           | 7.59        | -9.84            | 7.27        |                  |             |                  |             |
| Yasumoto et al., 2022 <sup>12</sup>     | 0                | 0.67        | 0.06             | 0.64        | -1.09            | 3.12        | -1.09            | 3.40        |                  |             |                  |             |

Note: FBG, fasting blood glucose; HbA1C, glycosylated hemoglobin; FPI, fasting plasma insulin; IG, intervention group; CG, control group.

Table S2 Sensitivity analysis for FBG, HbA1c and FPI by a fixed-effect model.

| Study ID                                | FPG                  |                    |      | HbA1c                |                    |      | FPI                 |                    |      |
|-----------------------------------------|----------------------|--------------------|------|----------------------|--------------------|------|---------------------|--------------------|------|
|                                         | WMD (95% CI)         | I <sup>2</sup> (%) | p    | WMD (95% CI)         | I <sup>2</sup> (%) | p    | WMD (95% CI)        | I <sup>2</sup> (%) | p    |
| Andallu et al., 2001 <sup>1</sup>       | -0.31 [-0.55, -0.07] | 87                 | 0.01 | -1.89 [-4.28, 0.49]  | 88                 | 0.12 |                     |                    |      |
| Aramwit et al., 2011 <sup>2</sup>       | -0.52 [-1.00, -0.03] | 95                 | 0.04 | -3.34 [-6.31, -0.38] | 92                 | 0.03 |                     |                    |      |
| Kim et al., 2015 <sup>3</sup>           | -0.52 [-0.92, -0.12] | 96                 | 0.01 | -3.09 [-5.96, -0.22] | 92                 | 0.03 | -1.80 [-3.85, 0.25] | 0                  | 0.09 |
| Kimura et al., 2007 <sup>4</sup>        | -0.52 [-0.97, -0.06] | 96                 | 0.03 |                      |                    |      |                     |                    |      |
| Kojima et al., 2010 <sup>5</sup>        | -0.52 [-0.93, -0.11] | 96                 | 0.01 | -3.34 [-6.29, -0.39] | 92                 | 0.03 | -0.34 [-2.75, 2.06] | 59                 | 0.78 |
| Qi et al., 2018 <sup>6</sup>            | -0.31 [-0.66, 0.03]  | 96                 | 0.08 | -1.78 [-3.94, 0.38]  | 85                 | 0.11 |                     |                    |      |
| Riche et al., 2017 <sup>7</sup>         | -0.48 [-0.86, -0.10] | 96                 | 0.01 | -3.14 [-6.14, -0.15] | 92                 | 0.04 |                     |                    |      |
| Taghizadeh et al., 2022 <sup>8</sup>    | -0.48 [-0.86, -0.10] | 96                 | 0.01 | -3.01 [-5.91, -0.11] | 93                 | 0.04 | -0.09 [-2.34, 2.16] | 50                 | 0.94 |
| Thaipitakwong et al., 2020 <sup>9</sup> | -0.50 [-0.91, -0.09] | 96                 | 0.02 | -3.03 [-6.40, 0.34]  | 93                 | 0.08 | -0.69 [-3.39, 2.02] | 64                 | 0.62 |
| Trimarco et al., 2015 <sup>10</sup>     | -0.49 [-0.89, -0.09] | 96                 | 0.02 | -3.25 [-6.25, -0.25] | 92                 | 0.03 | -0.36 [-2.86, 2.13] | 58                 | 0.78 |
| Yang et al., 2019 <sup>11</sup>         | -0.44 [-0.83, -0.05] | 96                 | 0.03 | -2.95 [-5.95, 0.05]  | 93                 | 0.05 |                     |                    |      |
| Yasumoto et al., 2022 <sup>12</sup>     | -0.51 [-0.91, -0.11] | 96                 | 0.01 | 0.00 [-1.86, 1.86]   | 92                 | 0.04 |                     |                    |      |

Note: FBG, fasting blood glucose; HbA1C, glycosylated hemoglobin; FPI, fasting plasma insulin.

Table S3. GRADE evidence profile for effect of ML/MLE supplementation on glycemic trail.

| No. of studies   | Study design      | Risk of bias | Certainty assessment |                                   |             |                      | No. of subjects |                     | WMD<br>95% CI           | Effect<br>Certainty   | Importance |
|------------------|-------------------|--------------|----------------------|-----------------------------------|-------------|----------------------|-----------------|---------------------|-------------------------|-----------------------|------------|
|                  |                   |              | Inconsistency        | Indirectness                      | Imprecision | Other considerations | Intervention    | Control/<br>Placebo |                         |                       |            |
| FBG (mmol/L)     |                   |              |                      |                                   |             |                      |                 |                     |                         |                       |            |
| 12               | Randomised trials | Not serious  | Serious **           | I <sup>2</sup> = 92%<br>Serious * | Serious #   | None                 | 326             | 325                 | -0.47<br>[-0.84, -0.10] | ⊕○○○<br>○<br>Very low | Critical   |
| HbA1c (mmol/mol) |                   |              |                      |                                   |             |                      |                 |                     |                         |                       |            |
| 11               | Randomised trials | Not serious  | Serious **           | I <sup>2</sup> = 96%<br>Serious*  | Serious #   | None                 | 320             | 319                 | -2.92<br>[-5.66, -0.18] | ⊕○○○<br>○<br>Very low | Critical   |
| FPI (μIU/mL)     |                   |              |                      |                                   |             |                      |                 |                     |                         |                       |            |
| 5                | Randomised trials | Serious *    | Serious **           | I <sup>2</sup> = 55%<br>Serious*  | Not serious | None                 | 108             | 106                 | -0.58<br>[-2.78, 1.62]  | ⊕⊕○○○<br>Low          | Critical   |

Note: FBG, fasting blood glucose; HbA1C, glycosylated hemoglobin; FPI, fasting plasma insulin. CI, Confidence interval; WMD, Weight mean difference; \* Overall, findings alternated from significantly favoring vitamin C (5 domains) to borderline (p=0.05) significant effects (2 domains) when undertaking sensitivity analyses on the basis of different individual Cochrane Risk of Bias domains when using only low risk studies – a decision was made to not rate down for risk of bias due to this relative consistency; \*\*Significant heterogeneity in meta-analysis (I<sup>2</sup> > 50%); \*

Surrogate outcome measure, not patient-important endpoint; # Upper bound 95% confidence interval of estimate outside of clinical meaningfulness.

## References

1. B. Andallu, V. Suryakantham, B. Lakshmi Srikanthi and G. K. Reddy, Effect of mulberry (*Morus indica* L.) therapy on plasma and erythrocyte membrane lipids in patients with type 2 diabetes, *Clinic Chimica Acta*, 2001, **314**, 47-53.
2. P. Aramwit, K. Petcharat and O. Supasyndh, Efficacy of mulberry leaf tablets in patients with mild dyslipidemia, *Phytother. Res.*, 2011, **25**, 365-369.
3. J. Y. Kim, H. M. Ok, J. Kim, S. W. Park, S. W. Kwon and O. Kwon, Mulberry leaf extract improves postprandial glucose response in prediabetic subjects: a randomized, double-blind placebo-controlled trial, *J. Med. Food*, 2015, **18**, 306-313.
4. T. Kimura, K. Nakagawa, H. Kubota, Y. Kojima, Y. Goto, K. Yamagishi, S. Oita, S. Oikawa and T. Miyazawa, Food-grade mulberry powder enriched with 1-deoxynojirimycin suppresses the elevation of postprandial blood glucose in humans, *J. Agric. Food Chem.*, 2007, **55**, 5869-5874.
5. Y. Kojima, T. Kimura, K. Nakagawa, A. Asai, K. Hasumi, S. Oikawa and T. Miyazawa, Effects of mulberry leaf extract rich in 1-deoxynojirimycin on blood lipid profiles in humans, *J. Clin. Biochem. Nutr.*, 2010, **47**, 155–161.
6. G. Qi, J. Wang, F. Qi, J. Wang and D. Du, Clinical study on mulberry leaf extract combined with aerobic exercise in treatment of Type 2 diabetes due to obesity, *Acta Chinese Medicine*, 2018, **33**, 1230-1235.
7. D. M. Riche, K. D. Riche, H. E. East, E. K. Barrett and W. L. May, Impact of mulberry leaf extract on type 2 diabetes (Mul-DM): A randomized, placebo-

- controlled pilot study, *Complement. Ther. Med.*, 2017, **32**, 105-108.
8. M. Taghizadeh, A. Mohammad Zadeh, Z. Asemi, A. H. Farrokhnezhad, M. R. Memarzadeh, Z. Banikazemi, M. Shariat and R. Shafabakhsh, Morus Alba leaf extract affects metabolic profiles, biomarkers inflammation and oxidative stress in patients with type 2 diabetes mellitus: A double-blind clinical trial, *Clinical Nutrition ESPEN*, 2022, **49**, 68-73.
  9. T. Thaipitakwong, O. Supasyndh, Y. Rasmi and P. Aramwit, A randomized controlled study of dose-finding, efficacy, and safety of mulberry leaves on glycemic profiles in obese persons with borderline diabetes, *Complement. Ther. Med.*, 2020, **49**, 102292.
  10. V. Trimarco, R. Izzo, E. Stabile, F. Rozza, M. Santoro, M. V. Manzi, F. Serino, G. G. Schiattarella, G. Esposito and B. Trimarco, Effects of a new combination of nutraceuticals with Morus alba on lipid profile, insulin sensitivity and endothelial function in dyslipidemic subjects. A cross-over, randomized, double-blind trial, *High Blood Press. Cardiovasc. Prev.*, 2015, **22**, 149-154.
  11. X. Yang and Z. Fang, Clinical efficacy evaluation of mulberry leaf tea intervention in type 2 diabetes and pre-diabetes population, *Clinical Journal of Traditional Chinese Medicine*, 2019, **31**, 2124-2127.
  12. K. Yasumoto, H. Hoshiko, N. Sekiguchi, H. Obata and T. Takara, Safety evaluation of a beverage containing mulberry leaf extract, *Biosci., Biotechnol., Biochem.*, 2022, **86**, 519-527.
